# Supplementary material for: PEGylated WS2 nanodrug system with erythrocyte membrane coating for chemo/photothermal therapy of cervical cancer
Source: Royal Society of Chemistry journal article supplement (doi:10.1039/d0bm00972e), 2020-01-01
Supplement: d0bm00972e1.pdf [file d0bm00972e1.pdf]

## PEGylated WS<sub>2</sub> nanodrug system with erythrocyte membrane coating for chemo/photothermal therapy of cervical cancer

Ying Long<sup>1,2#</sup>, Xianjin Wu<sup>1#\*</sup>, Zhen Li<sup>2</sup>, Jialong Fan<sup>2</sup>, Xing Hu<sup>1</sup>, Bin Liu<sup>1,2\*</sup>

<sup>1</sup>Key Laboratory of Research and Utilization of Ethnomedicinal Plant Resources of Hunan Province and Key Laboratory of Hunan Higher Education for Western Hunan Medicinal Plant and Ethnobotany, Huaihua University, Huaihua 418008, China

<sup>2</sup>College of Biology, Hunan University, Changsha, 410082, PR China

<sup>#</sup> These authors contributed to the work equally and should be regarded as co-first authors.

\* To whom correspondence should be addressed. Tel: +86 731 89720939; Fax: +86 731 89720939.

E-mail: hhuxianjin@163.com (X. Wu); binliu2001@hotmail.com (B. Liu)

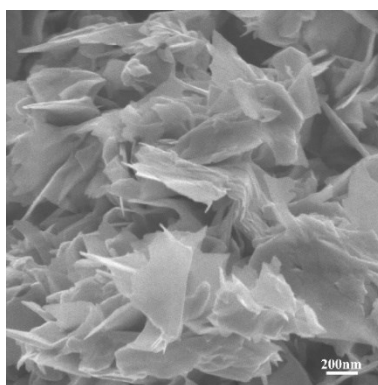

**Figure S1.** SEM image of WS<sub>2</sub> powder.

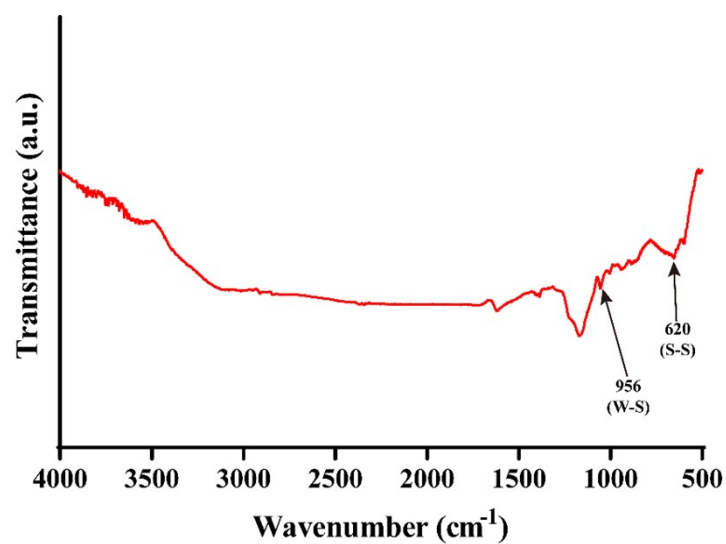

**Figure S2.** FT-IR spectra of WS<sub>2</sub> nanosheets.

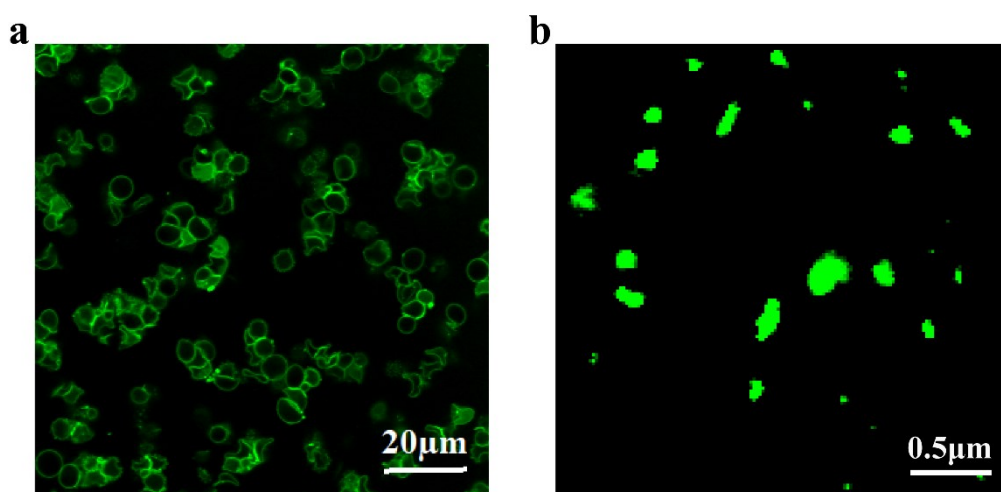

**Figure S3.** a) CLSM images of erythrocyte membrane. b) CLSM Images of erythrocyte membrane after treatment with sonication and physical extrusion.

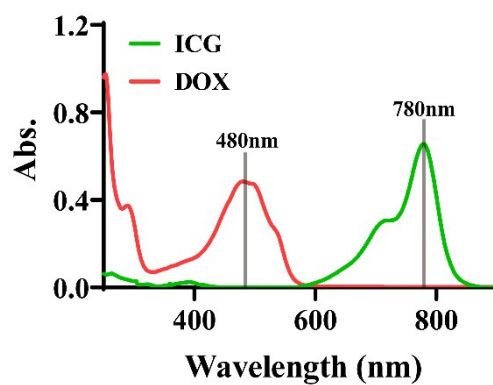

**Figure S4.** UV-vis absorbance spectrum of free DOX and ICG.

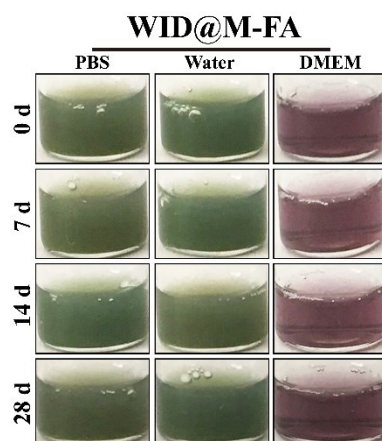

**Figure S5.** Stability photograph of WID@M-FA NPs with different solution (PBS, water, and DMEM (10 % FBS), 200  $\mu\text{g/mL}$ ) at different points time.

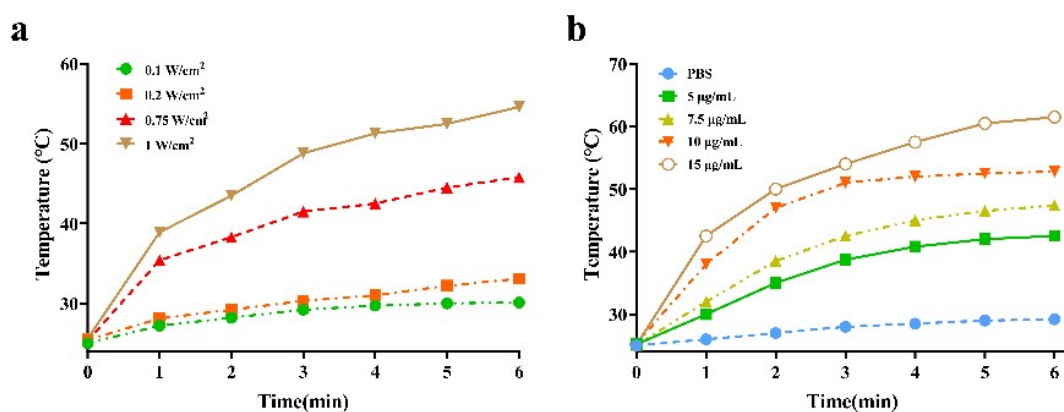

**Figure S6.** a) The photothermal heating curves of WID@M-FA NPs solutions with same concentration of ICG (10  $\mu\text{g/mL}$ ) under different 808 nm NIR laser intensity (0.1, 0.2, 0.75, and 1  $\text{W/cm}^2$ ) for 6 min. b) The photothermal heating curves of PBS and WID@M-FA NPs solutions with different concentrations (5, 7.5, 10, and 15  $\mu\text{g/mL}$ , ICG) under 808 nm NIR laser irradiation at the power density of 1  $\text{W/cm}^2$  for 6 min.

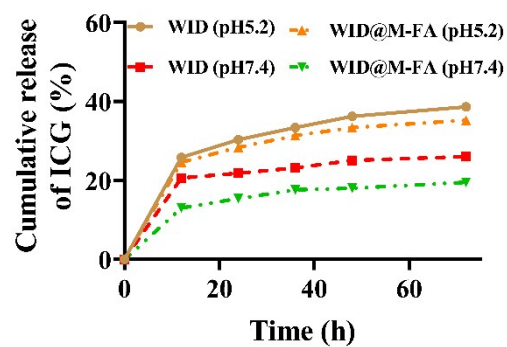

**Figure S7.** ICG release behavior from WID and WID@M-FA NPs at pH 7.4 and 5.2.

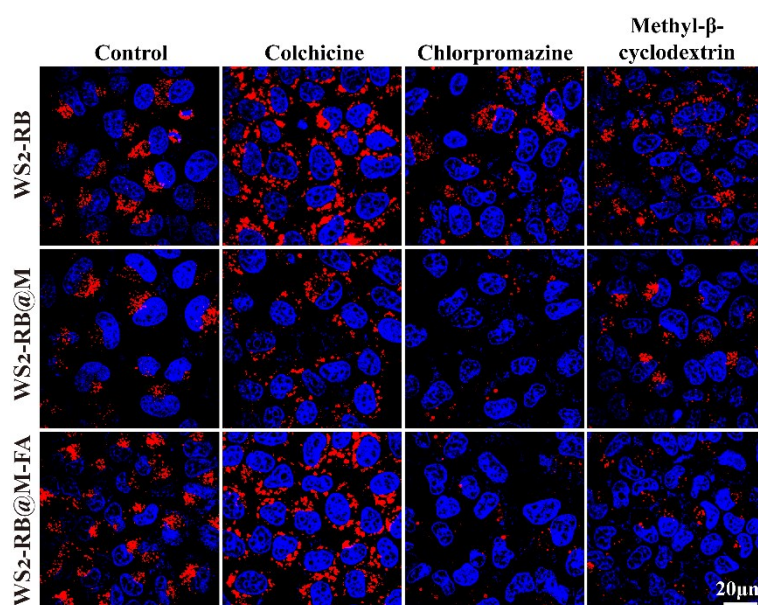

**Figure S8.** The effect of inhibitors on the cell uptake. CLSM image of the cell uptake mechanism for WS<sub>2</sub>-RB, WS<sub>2</sub>-RB@M, and WS<sub>2</sub>-RB@M-FA NPs in the presence of different inhibitors.
